# Supplementary material
Source: publisher figshare collection journal article supplement (https://acs.figshare.com/ndownloader/files/5539289)
Supplement: Supplementary file 1 [file 5539289]

## Supporting Information.

**Table S1.** Compositional analysis. Chemical composition analysis of all the allomorphs of cellulose-I suggests that no degradation of cellulose occurred during their preparation.

| Sample                 | Arabinan | Galactan | Glucan      | Xylan | Ash  |
|------------------------|----------|----------|-------------|-------|------|
| Fluka CL Cel I         | 0.0%     | 0.0%     | 99.0 ± 0.3% | 0.8%  | 0.1% |
| Fluka CL Cel II 145°C  | 0.0%     | 0.0%     | 99.8 ± 0.8% | 0.0%  | 0.2% |
| Fluka CL Cel III 130°C | 0.0%     | 0.0%     | 99.1 ± 0.8% | 0.7%  | 0.1% |

**Table S2.** Inductively coupled plasma atomic emission spectroscopy (ICP-AES) analysis reported as PPM ( $\mu\text{g/g}$ ) of the cellulose samples. If the element was below the instrument detection limit, it is indicated by BDL. ICP-AES analysis suggests that the ash content of the samples is insufficient to have a major influence on their pyrolysis behavior.<sup>45</sup>

| Sample   | CI-H        | CI-M        | CI-L         | CII-H        | CII-M        | CII-L       | CIII-H      | CIII-M      | CIII-L      | Amorph       |
|----------|-------------|-------------|--------------|--------------|--------------|-------------|-------------|-------------|-------------|--------------|
| Dilution | 98.0        | 251.0       | 413.0        | 148.0        | 185.0        | 165.0       | 176.0       | 130.0       | 171.0       | 862.0        |
| Al       | 7.7 ± 0.08  | 18.6 ± 0.11 | 16.1 ± 0.11  | 12.6 ± 0.14  | 10.5 ± 0.20  | 6.0 ± 0.06  | 5.0 ± 0.15  | 8.9 ± 0.06  | 5.6 ± 0.06  | 25.8 ± 0.76  |
| Ca       | 21.5 ± 0.11 | 56.7 ± 0.66 | 69.6 ± 0.20  | 85.2 ± 1.24  | 159.5 ± 1.61 | 28.1 ± 0.29 | 17.0 ± 0.06 | 16.1 ± 0.03 | 14.3 ± 0.09 | 167.9 ± 1.70 |
| Fe       | 2.4 ± 0.10  | 64.4 ± 0.57 | 10.3 ± 0.94  | 32.4 ± 0.36  | 24.4 ± 0.33  | 25.5 ± 0.20 | 27.2 ± 0.32 | 9.1 ± 0.11  | 13.5 ± 0.04 | 321.1 ± 3.32 |
| K        | BDL         | BDL         | BDL          | BDL          | BDL          | BDL         | BDL         | BDL         | BDL         | BDL          |
| Mg       | 5.9 ± 0.09  | 16.0 ± 0.20 | 27.4 ± 0.02  | 20.8 ± 0.31  | 30.6 ± 0.46  | 6.6 ± 0.03  | 5.3 ± 0.04  | 4.9 ± 0.02  | 5.1 ± 0.04  | 36.3 ± 0.24  |
| Na       | 28.1 ± 0.12 | 50.6 ± 1.80 | 109.3 ± 1.30 | 251.3 ± 2.85 | 510.3 ± 3.05 | 33.7 ± 0.33 | 26.2 ± 0.82 | 35.7 ± 0.37 | 34.8 ± 0.43 | 87.4 ± 7.93  |
| P        | BDL         | BDL         | BDL          | BDL          | BDL          | BDL         | BDL         | BDL         | BDL         | BDL          |
| S        | 32.9 ± 0.94 | BDL         | BDL          | 23.5 ± 1.63  | 29.2 ± 1.45  | 22.8 ± 2.63 | 30.2 ± 1.83 | 37.8 ± 0.68 | 34.7 ± 1.71 | 86.6 ± 2.66  |

(45) Patwardhan, P. R.; Satrio, J. A.; Brown, R. C.; Shanks, B. H. Influence of inorganic salts on the primary pyrolysis products of cellulose. *Bioresource Technol* **2010**, *101* (12), 4646.
